# Supplementary material
Source: publisher site journal article supplement (https://www.spandidos-publications.com/8654/downloadSupplementary)
Supplement: Supplementary file 1 [file downloadSupplementary]

Table SI. Predictive performance of the two models for 1-, 3- and 5-year survival.

|                      | <b>AUC</b> | <b>95% CI</b> | <b>Sensitivity</b> | <b>Specificity</b> |
|----------------------|------------|---------------|--------------------|--------------------|
| TNM-sarcopenia model |            |               |                    |                    |
| 5-year               | 0.610      | 0.537-0.683   | 0.601              | 0.620              |
| 3-year               | 0.629      | 0.551-0.707   | 0.630              | 0.610              |
| 1-year               | 0.574      | 0.436-0.712   | 0.555              | 0.557              |
| TNM-model            |            |               |                    |                    |
| 5-year               | 0.587      | 0.514-0.660   | 0.377              | 0.769              |
| 3-year               | 0.588      | 0.508-0.668   | 0.404              | 0.765              |
| 1-year               | 0.560      | 0.424-0.696   | 0.396              | 0.732              |

AUC, area under the curve.
